# Supplementary material for: Light-mediated activation of nitric oxide and antibacterial polymers for anti-biofilm applications
Source: Royal Society of Chemistry journal article supplement (doi:10.1039/d5tb01132a), 2025-01-01
Supplement: d5tb01132a1.pdf [file d5tb01132a1.pdf]

## Supporting information

### Light-mediated activation of nitric oxide and antibacterial polymers for anti-biofilm applications

Siyuan Luo,<sup>a</sup> Zuotao Zhou,<sup>a</sup> Yu Jin,<sup>a</sup> Haochuan Ding,<sup>a</sup> Faxing Jiang,<sup>\*c</sup> and Zhiqiang Shen<sup>\*a,b</sup>

<sup>a</sup> School of Biomedical Engineering, Division of Life Sciences and Medicine, University of Science and Technology of China, Hefei, Anhui Province, 230026, China. E-mail: [shenzq@ustc.edu.cn](mailto:shenzq@ustc.edu.cn)

<sup>b</sup> Suzhou Institute for Advanced Research, University of Science and Technology of China, Suzhou, 215123, China.

<sup>c</sup> Department of Dermatology, the First Affiliated Hospital-University of Science and Technology of China (Anhui Provincial Hospital), Hefei, Anhui Province, 230001, China. E-mail: [jiangfxing@ustc.edu.cn](mailto:jiangfxing@ustc.edu.cn)

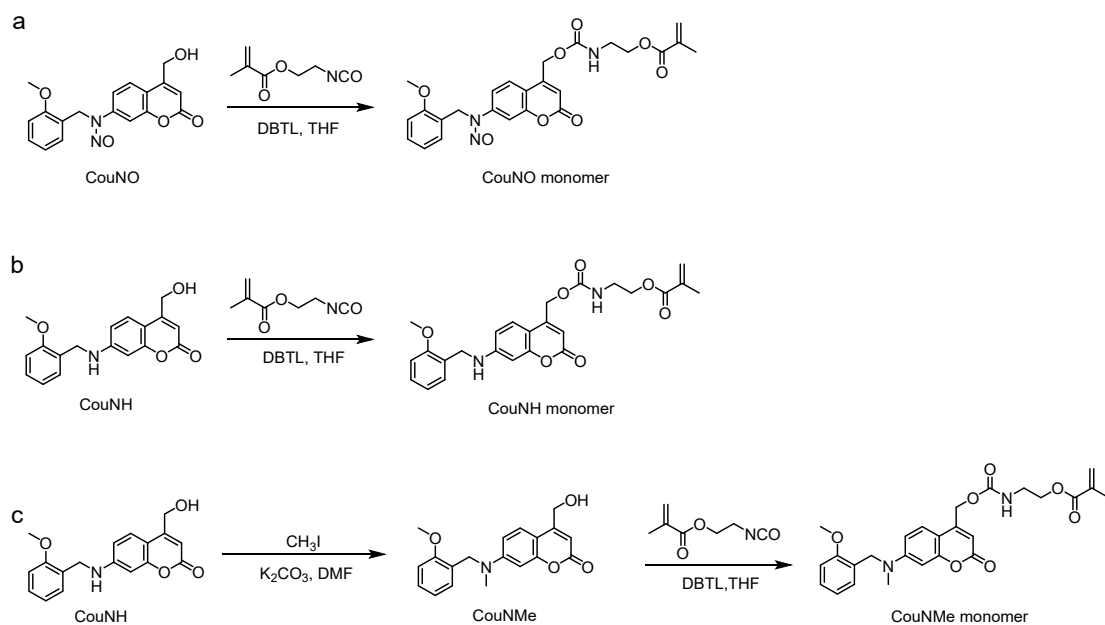

**Scheme S1** Synthetic routes of (a) CouNO monomer, (b) CouNH monomer, and (c) CouNMe monomer.

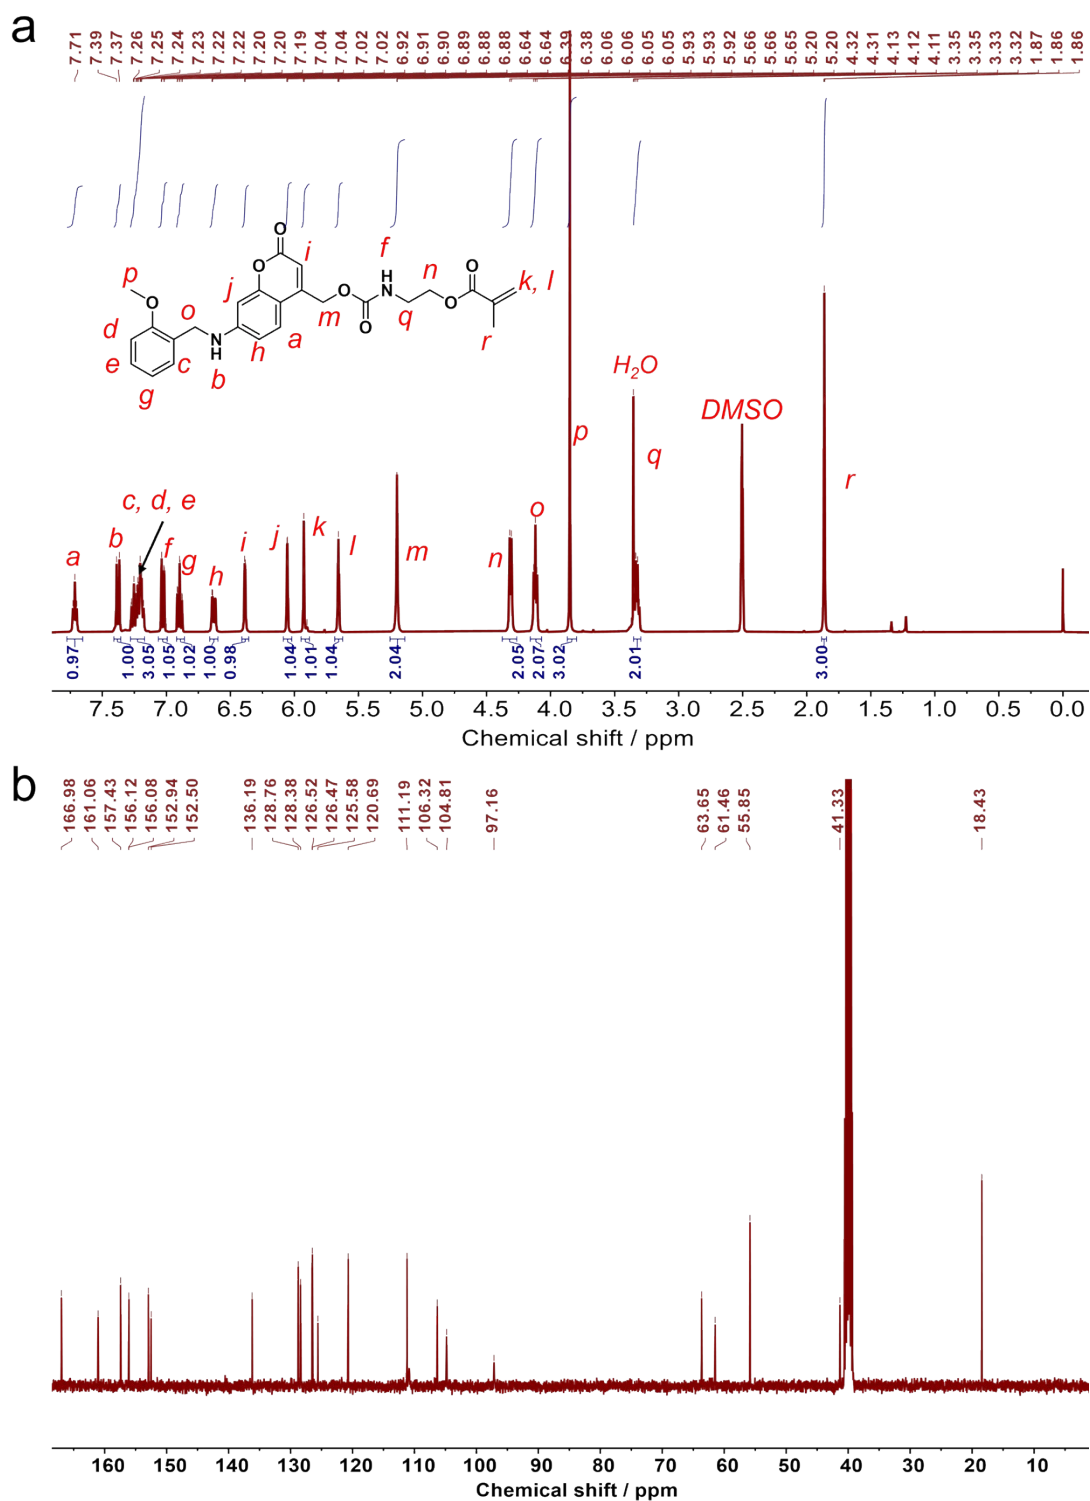

**Fig. S1** (a)  $^1\text{H}$  NMR and (b)  $^{13}\text{C}$  NMR spectra recorded in  $\text{DMSO-}d_6$  for CouNH monomer.

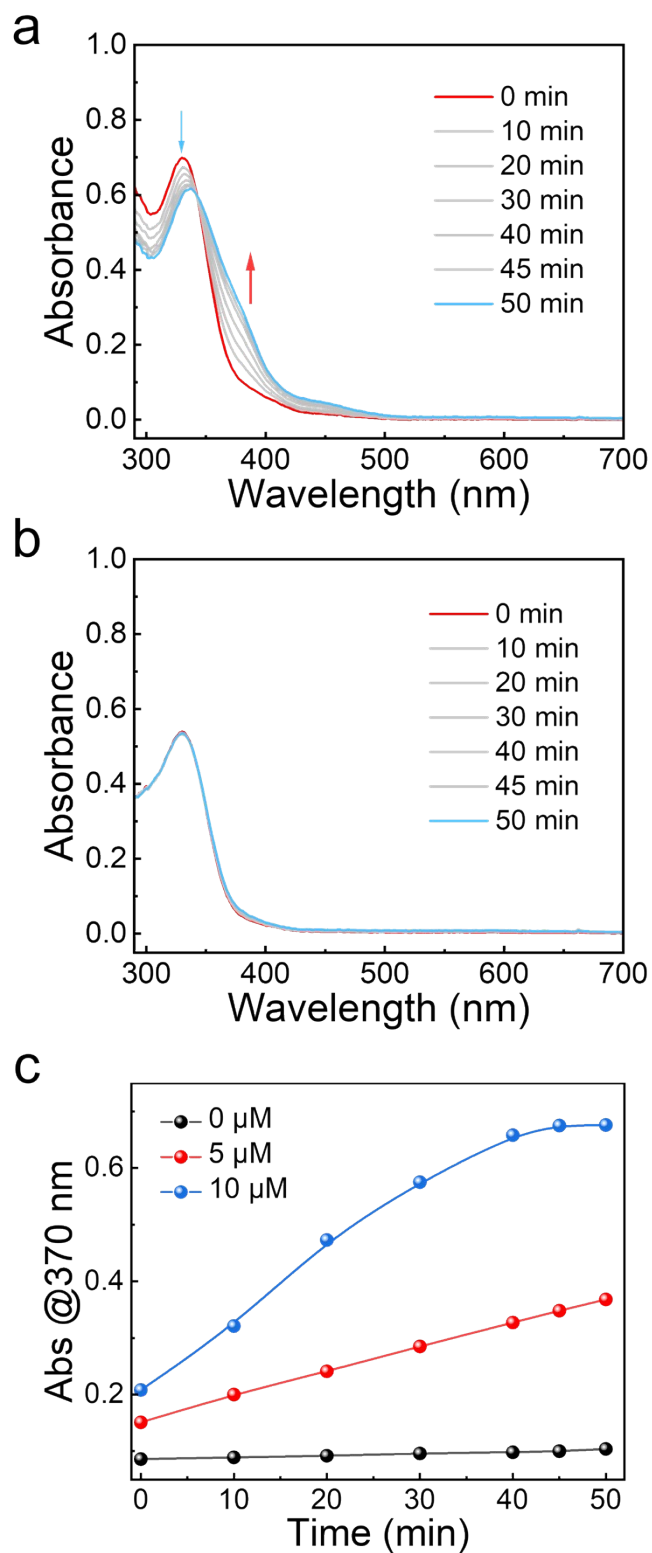

**Fig. S2** Evolution of UV-vis spectra of CouNO monomer (50  $\mu\text{M}$ ) in the presence of (a) 0, (b) 5  $\mu\text{M}$  *fac*-Ir(ppy)<sub>3</sub> in DMSO under 500 nm light irradiation (30  $\text{mW}/\text{cm}^2$ ). (c) Time-dependent changes of absorption intensities at 370 nm of CouNO monomer (50  $\mu\text{M}$ ) under above conditions and the presence of 10  $\mu\text{M}$  *fac*-Ir(ppy)<sub>3</sub> in DMSO under 500 nm light irradiation (30  $\text{mW}/\text{cm}^2$ ).

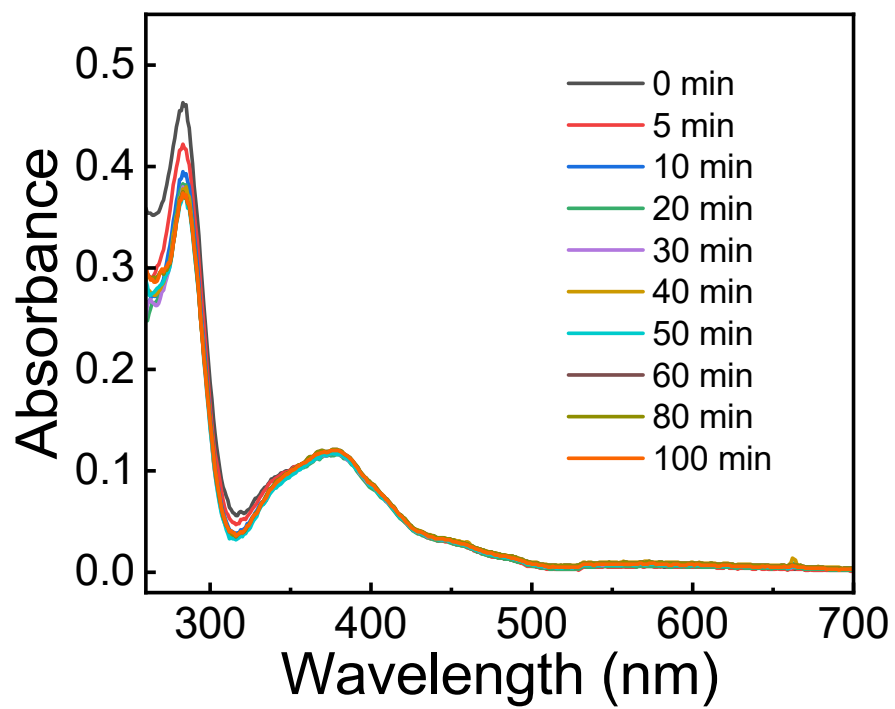

**Fig. S3** Evolution of UV-vis spectra of 10  $\mu\text{M}$  *fac*-Ir(ppy)<sub>3</sub> in DMSO under 500 nm irradiation (30 mW/cm<sup>2</sup>).

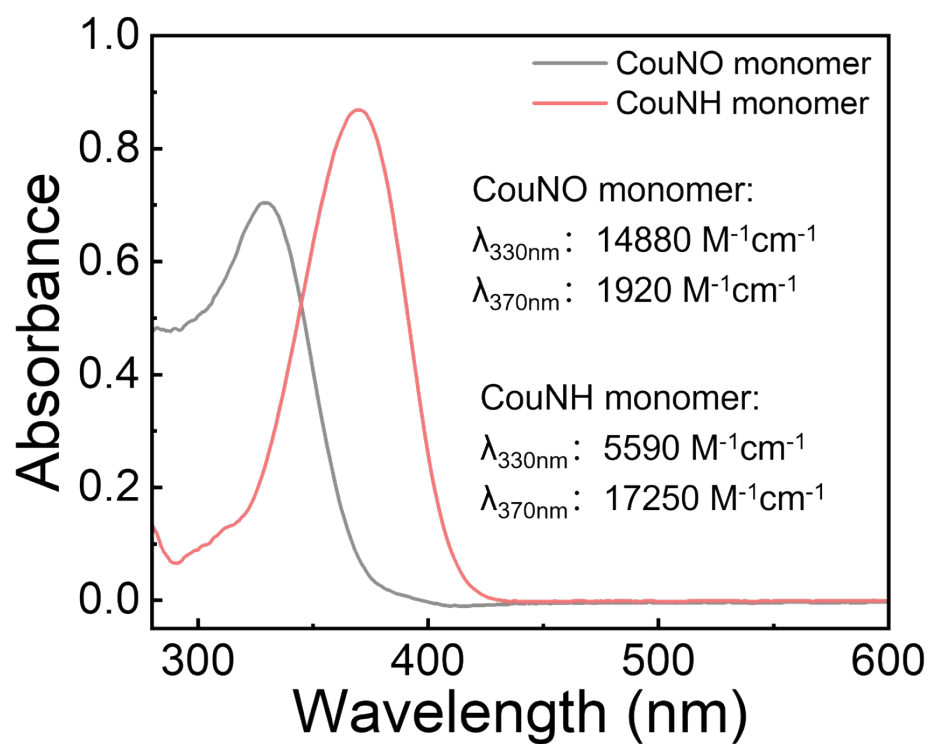

**Fig. S4** UV-vis absorbance spectra in DMSO and corresponding extinction coefficients of CouNO monomer and CouNH monomer.

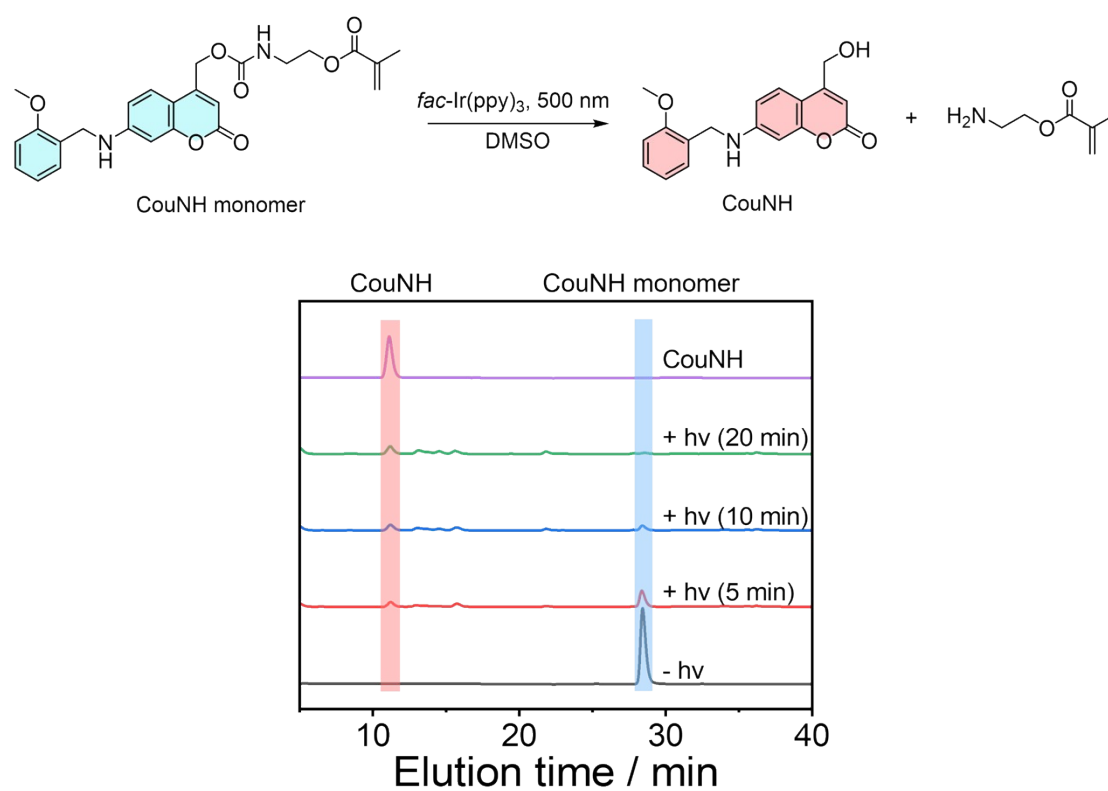

**Fig. S5** HPLC trace recorded for sequential degradation of compound CouNH monomer under the light irradiation (500 nm, 30 mW/cm<sup>2</sup>) with  $fac-Ir(ppy)_3$ .

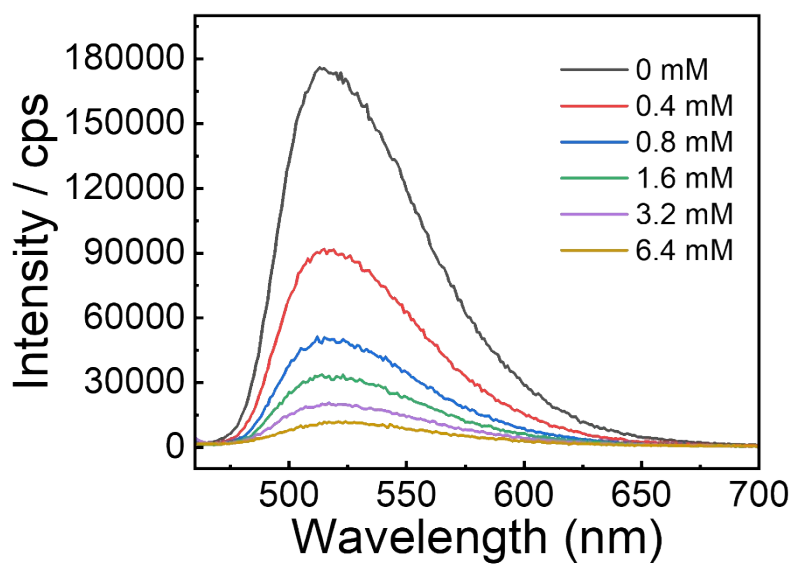

**Fig. S6** Steady-state emission spectra ( $\lambda_{\text{ex}} = 455 \text{ nm}$ ) of *fac*-Ir(ppy)<sub>3</sub> (10 μM) in the presence of varying concentrations of CouNO monomer in deoxygenated DMF.



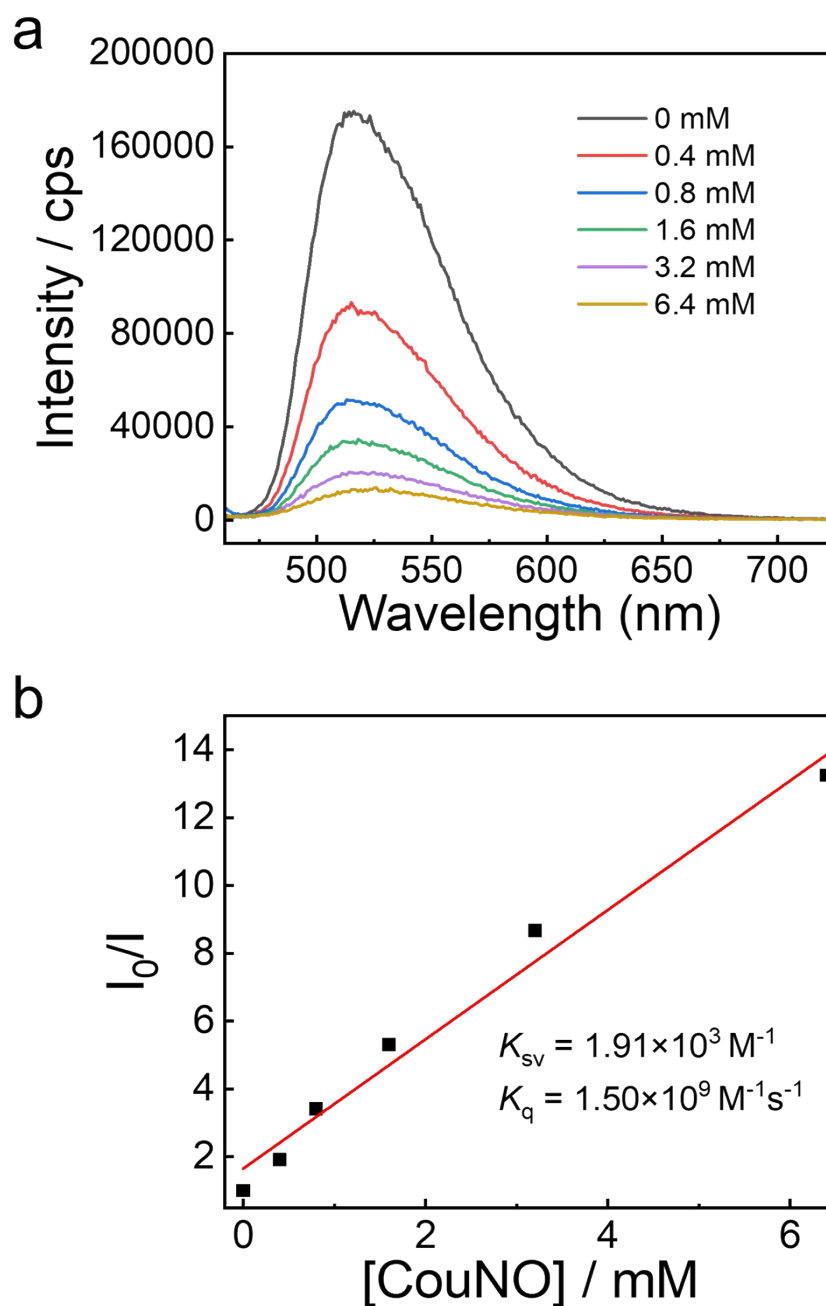

**Fig. S7** (a) Steady-state phosphorescence intensity changes ( $\lambda_{\text{ex}} = 455 \text{ nm}$ ) of *fac*-Ir(ppy)<sub>3</sub> (10 μM) in the presence of varying concentrations of CouNO in Ar-saturated DMF. (b) Stern-Volmer plot of phosphorescence intensity quenching of *fac*-Ir(ppy)<sub>3</sub> (10 μM) by CouNO in Ar-saturated DMF.

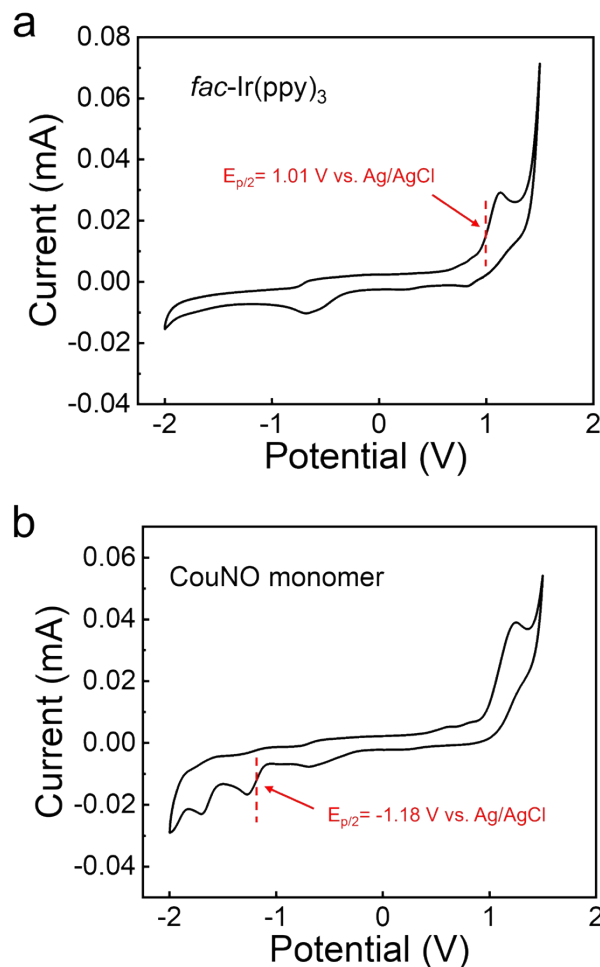

**Fig. S8** Cyclic voltammogram curves of (a) *fac*-Ir(ppy)<sub>3</sub>, (b) CouNO monomer, in DMF (0.1 M Bu<sub>4</sub>NBF<sub>4</sub>) (scan rate, 0.1 V/s). In all measurements, the concentration of all samples was 1 mM.

**Note.** Cyclic voltammetry was conducted using 0.1 M tetrabutylammonium tetrafluoroborate as the electrolyte in DMF at 25 °C with an Ag/AgCl reference electrode. The maximal luminescence wavelength of *fac*-Ir(ppy)<sub>3</sub> was estimated to be 517 nm (Fig. S6), and the  $E_{1/2}^{\text{ox}}$  of *fac*-Ir(ppy)<sub>3</sub> was determined to be + 1.01 V (vs Ag/AgCl). Using the maximal luminescence wavelength and  $E_{1/2}^{\text{ox}}$ , the excited state reduction potential of *fac*-Ir(ppy)<sub>3</sub> was estimated according to the following equations:

$$E_{1/2}([fac\text{-Ir(ppy)}_3]^+/[fac\text{-Ir(ppy)}_3]^*) = E_{1/2}^{\text{ox}} - E_{0,0}$$

$$E_{0,0} = hc/\lambda_{\text{max}} = 1240 \text{ nm}/\lambda_{\text{max}}$$

As such, the excited state reduction potential was calculated to be  $E_{1/2}([fac\text{-Ir(ppy)}_3]^+/[fac\text{-Ir(ppy)}_3]^*) = E_{1/2}^{\text{ox}} - E_{0,0} = 1.01 \text{ V} - 1240 \text{ nm}/517 \text{ nm} = -1.39 \text{ V}$ .

**Table. S1** Properties of NO donor and photosensitizer used in this study.

| Entry                            | S <sub>1</sub> (eV) <sup>[a]</sup> | T <sub>1</sub> (eV) <sup>[b]</sup> | LUMO (eV) <sup>[c]</sup> | HOMO (eV) <sup>[d]</sup> |
|----------------------------------|------------------------------------|------------------------------------|--------------------------|--------------------------|
| <i>fac</i> -Ir(ppy) <sub>3</sub> | 2.96                               | 2.40                               | -1.70                    | -5.41                    |
| CouNO monomer                    | 3.09                               | 2.24                               | -2.47                    | -6.37                    |
| CouNH monomer                    | 3.41                               | 2.46                               | -1.95                    | -5.64                    |
| CouNO                            | 3.09                               | 2.23                               | -2.44                    | -6.36                    |

<sup>a</sup>Singlet energy (eV). <sup>b</sup>Triplet energy (eV). <sup>c</sup>Lowest unoccupied molecular orbital (eV).

<sup>d</sup>Highest occupied molecular orbital (eV).

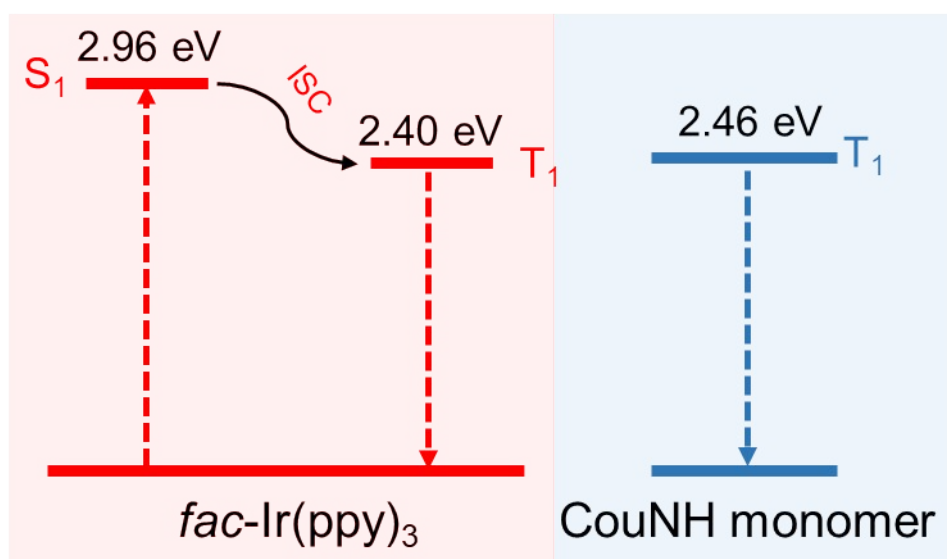

**Fig. S9** The singlet (S<sub>1</sub>) and triplet (T<sub>1</sub>) energy levels of *fac*-Ir(ppy)<sub>3</sub> and T<sub>1</sub> energy levels of CouNH monomer.

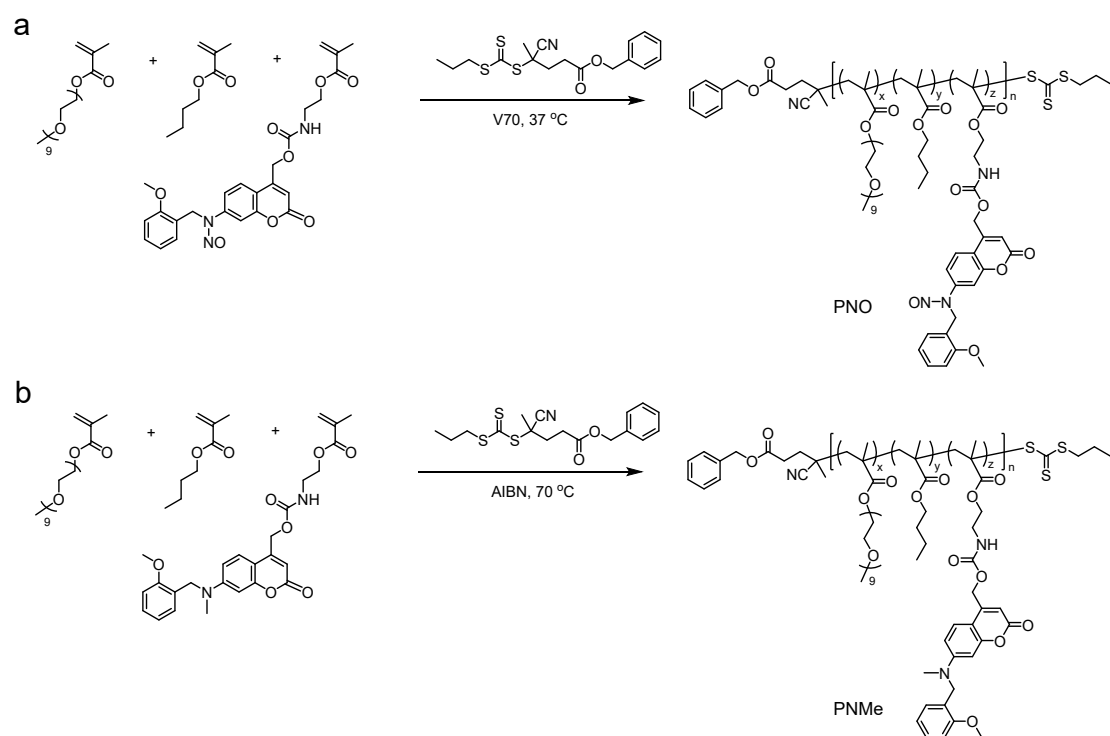

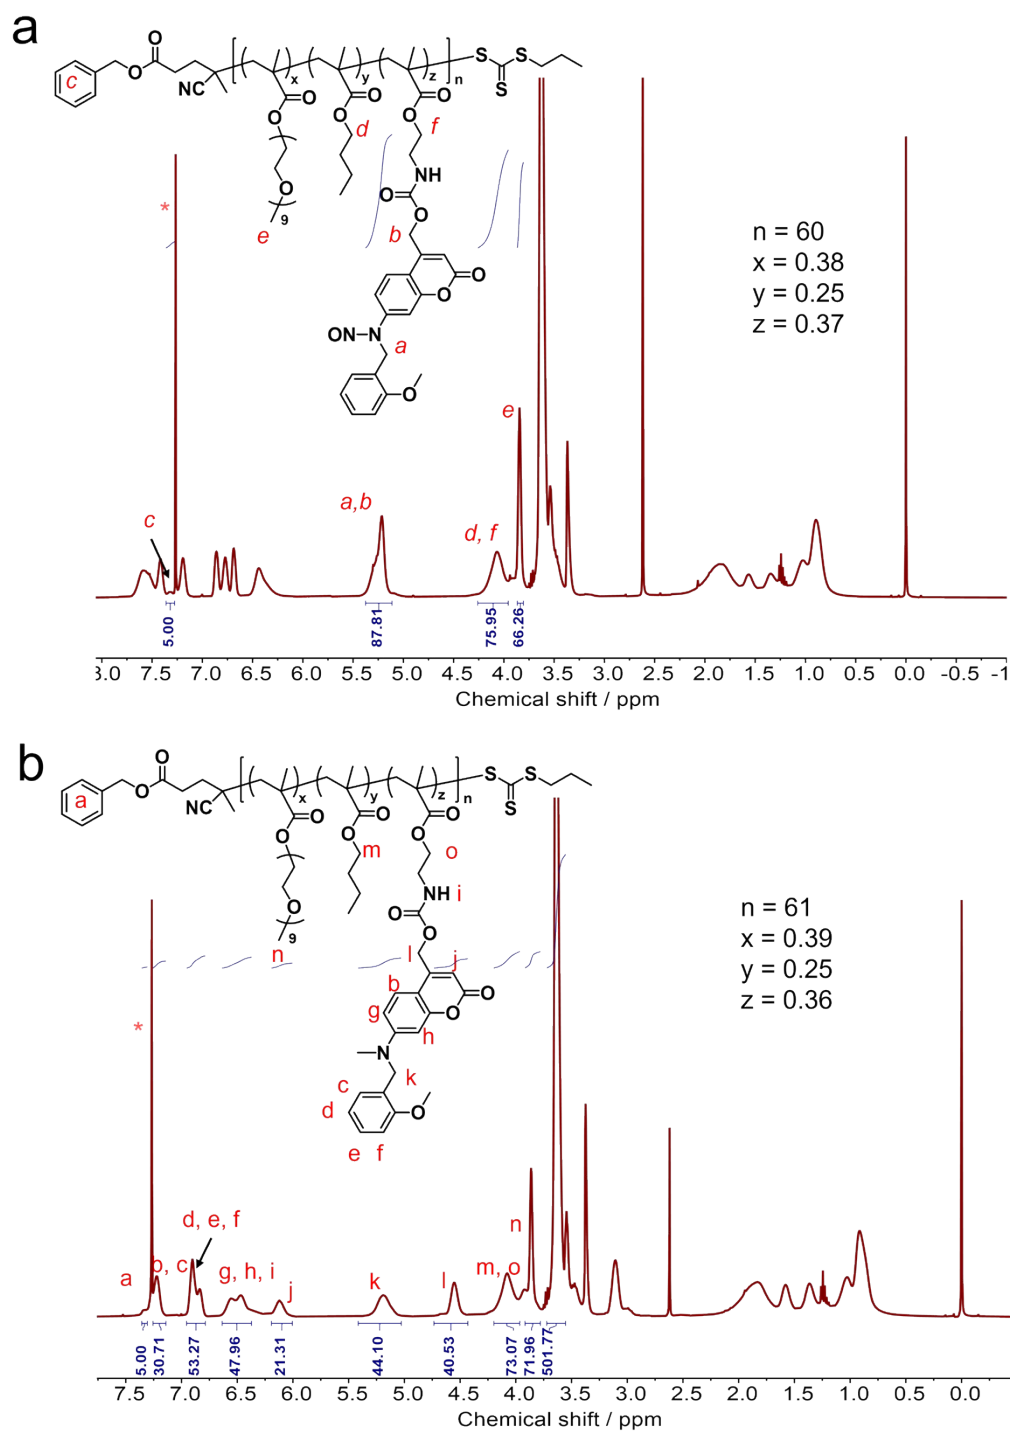

**Fig. S10**  $^1\text{H}$  NMR spectra recorded in  $\text{CDCl}_3$  for (a) PNO and (b) PNMe.

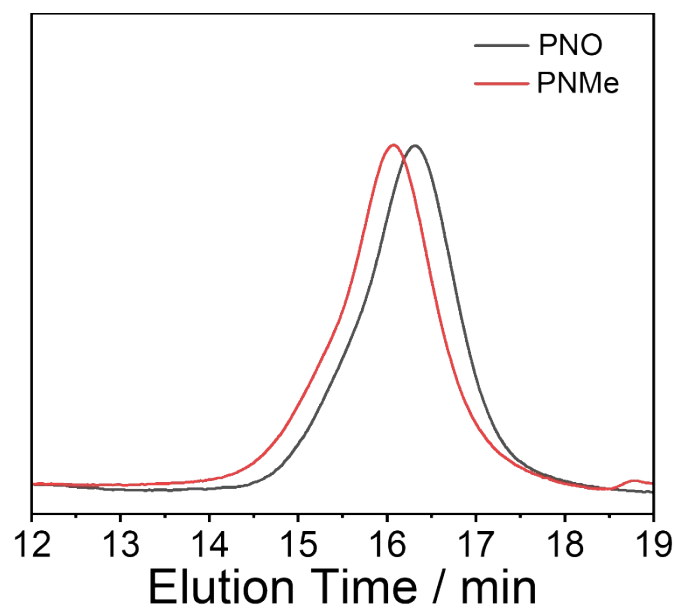

**Fig. S11** GPC elution profiles of PNO and PNMe.

**Table. S2** Structural parameters of the amphiphilic copolymers used in this study.

| Entry       | Chemical composition <sup>a</sup>                                                          | $M_{n, NMR}$          | $M_{n, SEC}$          | $M_w/M_n$    |
|-------------|--------------------------------------------------------------------------------------------|-----------------------|-----------------------|--------------|
|             |                                                                                            | <sup>a</sup><br>(kDa) | <sup>b</sup><br>(kDa) | <sup>b</sup> |
| <b>PNO</b>  | P(OEGMA <sub>0.38</sub> -co-BMA <sub>0.25</sub> -co-CouNO <sub>0.37</sub> ) <sub>60</sub>  | 24.5                  | 21.5                  | 1.25         |
| <b>PNMe</b> | P(OEGMA <sub>0.39</sub> -co-BMA <sub>0.25</sub> -co-CouNMe <sub>0.36</sub> ) <sub>61</sub> | 25.0                  | 25.8                  | 1.27         |

<sup>a</sup> calculated from <sup>1</sup>H NMR results; <sup>b</sup> determined by GPC using THF as the eluent.

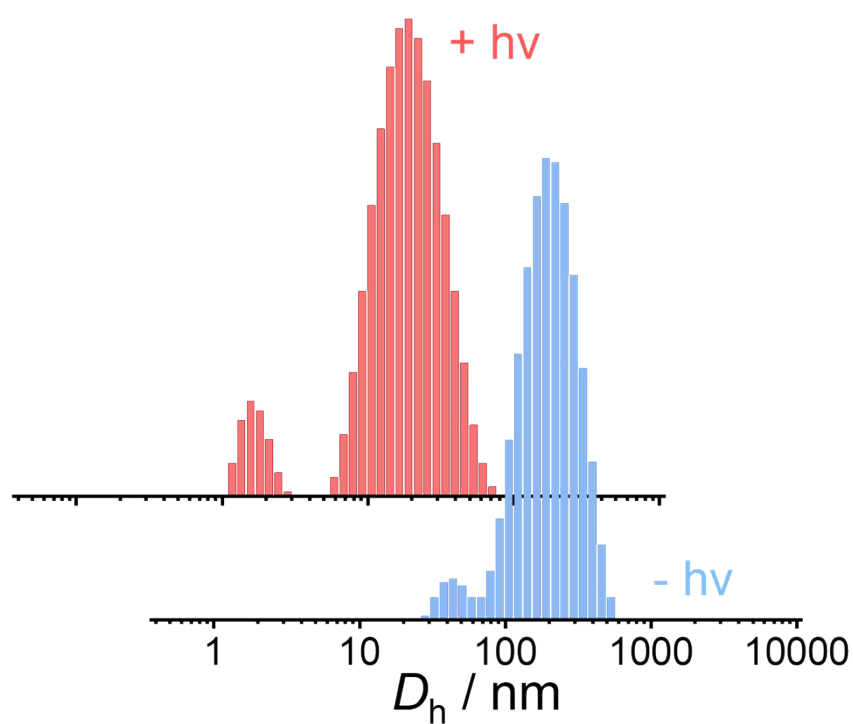

**Fig. S12** Intensity-average hydrodynamic diameter distributions of PNO@Ir micelles with or without 500 nm irradiation for 30 min at pH 7.4, respectively. In all cases, the irradiation intensity was 30 mW/cm<sup>2</sup> under a hypoxic condition.

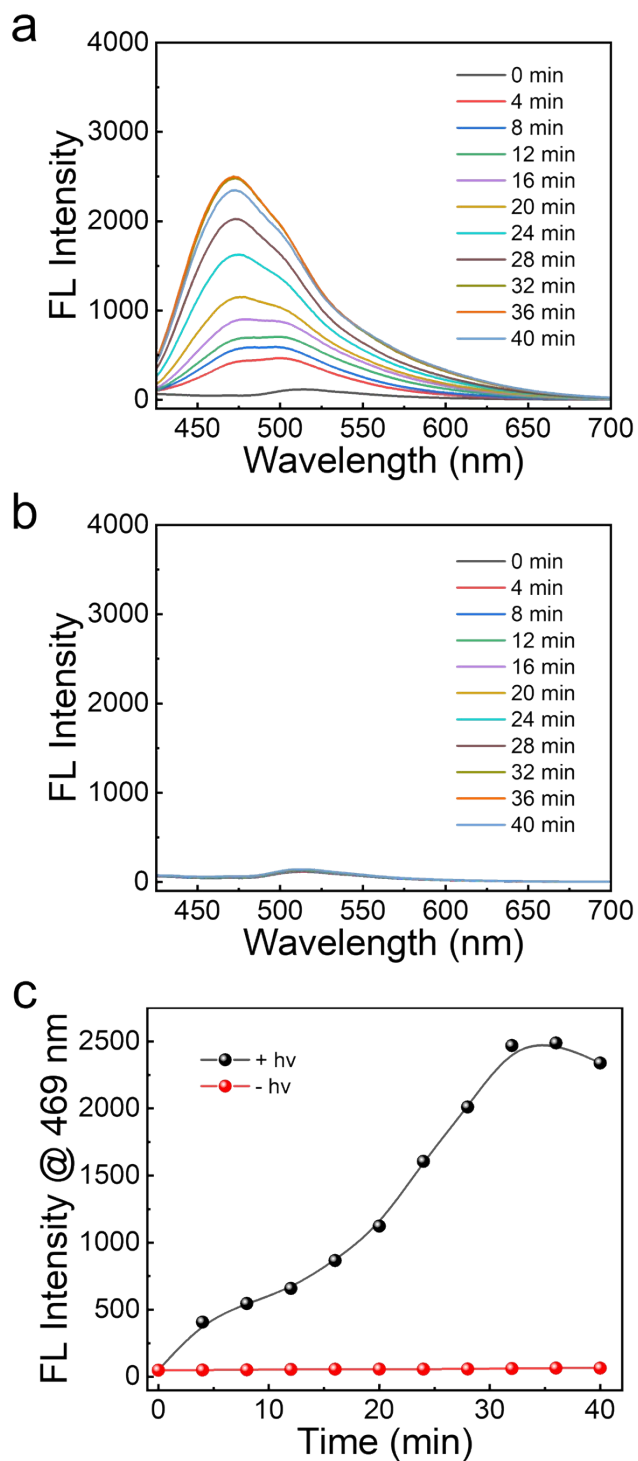

**Fig. S13** Fluorescence emission spectra ( $\lambda_{\text{ex}} = 405 \text{ nm}$ ) of aqueous dispersions (0.2 g/L) of PNO@Ir in the presence of sodium ascorbate (10 mM) (a) with and (b) without 500 nm light irradiation. (c) Fluorescence intensity changes ( $\lambda_{\text{ex}} = 405 \text{ nm}$ , slit width:  $E_x$ . 10 nm;  $E_m$ . 10 nm) of solution (0.2 g/L) of PNO@Ir in the presence of sodium ascorbate (10 mM) with and without 500 nm light irradiation.



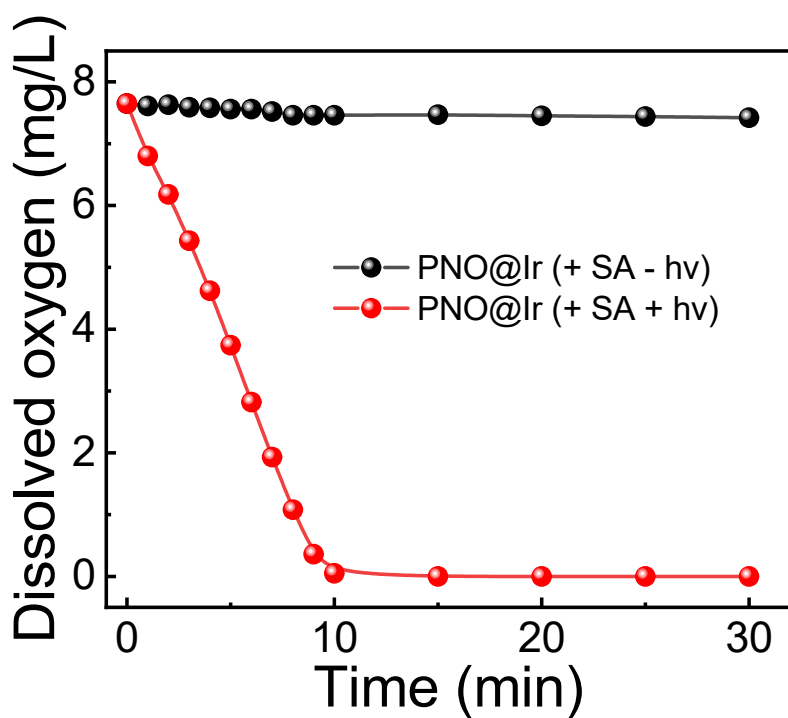

**Fig. S14** Changes of oxygen concentrations of aqueous dispersions (0.2 g/L) PNO@Ir micelles in the presence of 10 mM sodium ascorbate with or without 500 nm light irradiation (30 mW/cm<sup>2</sup>).

Note. The produced singlet oxygen under red light irradiation was consumed by sodium ascorbate, leading to a decreased dissolved oxygen in solutions.

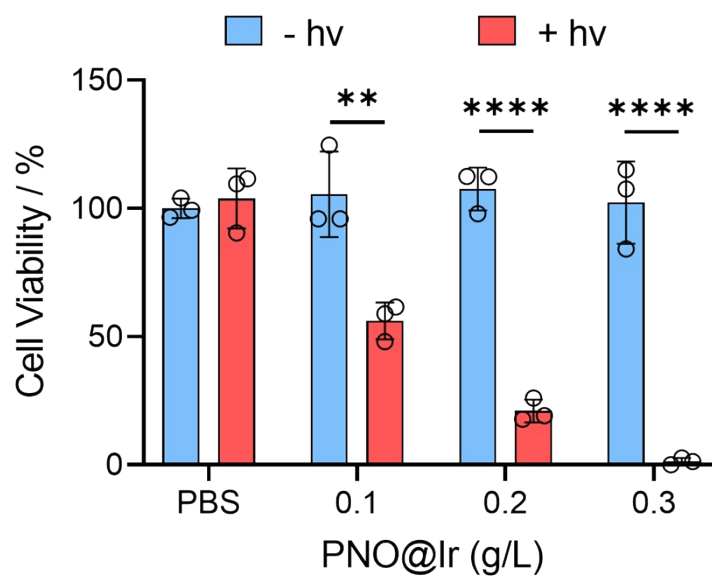

**Fig. S15** MRSA viability after treatment with PNO@Ir micelles without or with 500 nm irradiation for 30 min. Data are shown as the mean  $\pm$  s.d. ( $n = 3$ ); \*\* $p < 0.01$ , \*\*\* $p < 0.001$ , \*\*\*\* $p < 0.0001$ .

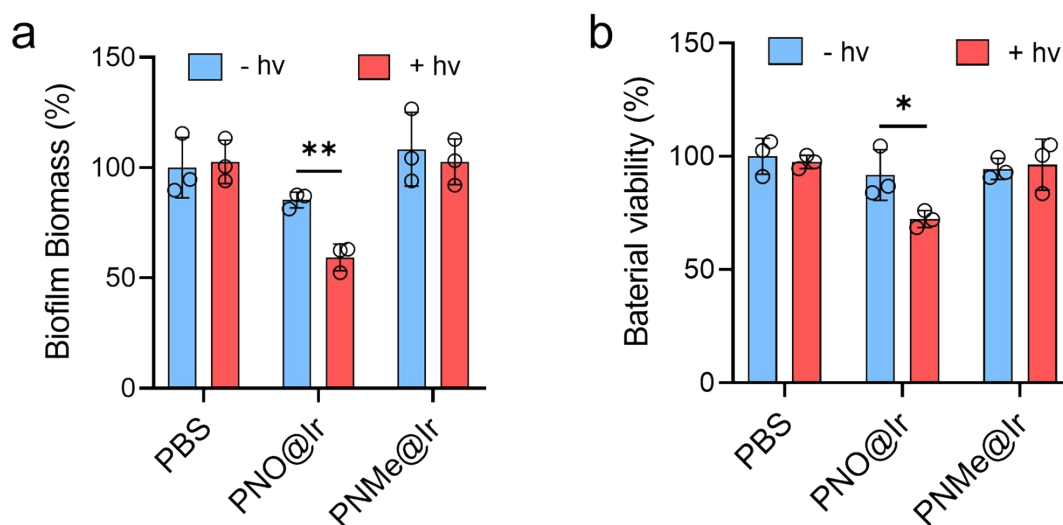

**Fig. S16** (a) Bacterial biomass of *P. aeruginosa* PAO1 biofilms by crystal violet staining and (b) corresponding bacterial viability after treatment with PBS, PNO@Ir, and PNMe@Ir micelles without or with 500 nm light irradiation for 30 min under hypoxic conditions, respectively. Data are shown as the mean  $\pm$  s.d. ( $n = 3$ ); \* $p < 0.05$ , \*\* $p < 0.01$ .

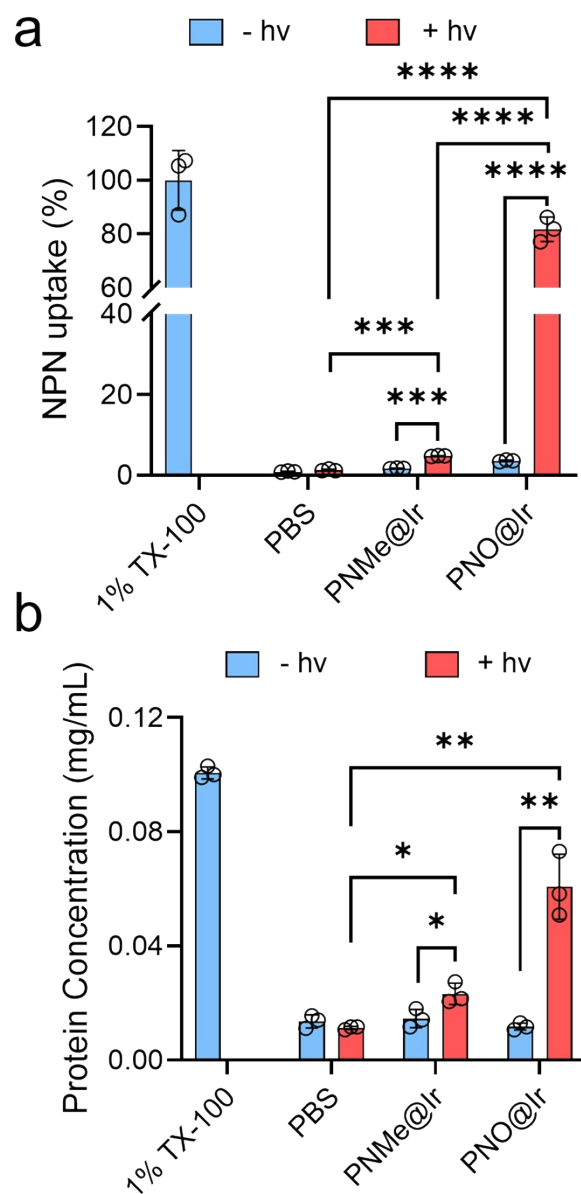

**Fig. S17** (a) NPN uptake, (b) protein leakage assay of MRSA after treatment with PNO@Ir, PNMe@Ir micelles (0.2 g/L) without or with 500 nm irradiation for 30 min. In all cases, 1% TX-100 and PBS were used as the positive and negative controls, respectively. Data are shown as the mean  $\pm$  s.d. ( $n = 3$ ); \* $p < 0.05$ , \*\* $p < 0.01$ , \*\*\* $p < 0.001$ , \*\*\*\* $p < 0.0001$ .

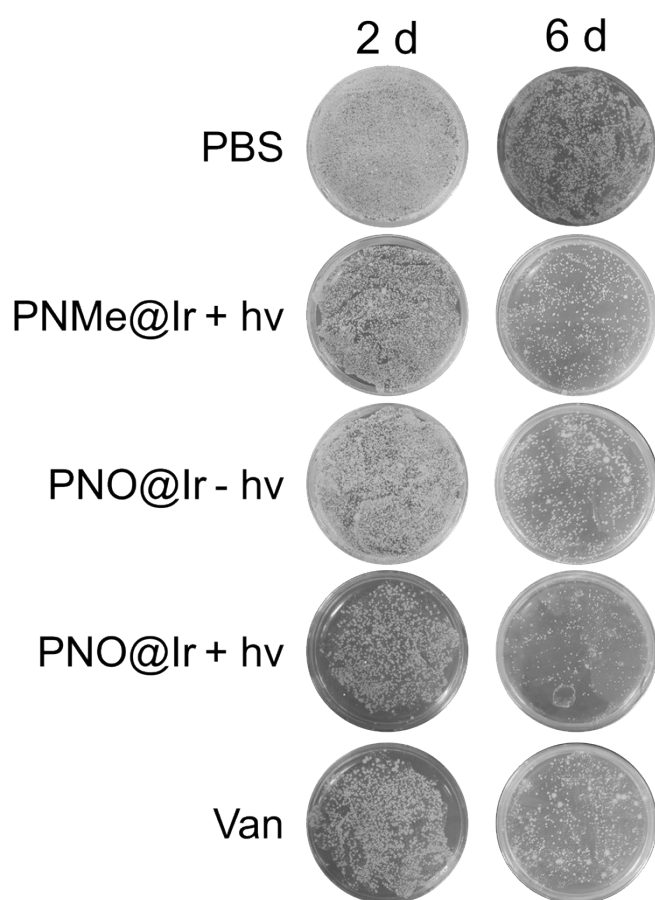

**Fig. S18** Photographs of bacterial colonies on the agar plates of the wound tissues with varying treatments on day 2 and day 6.

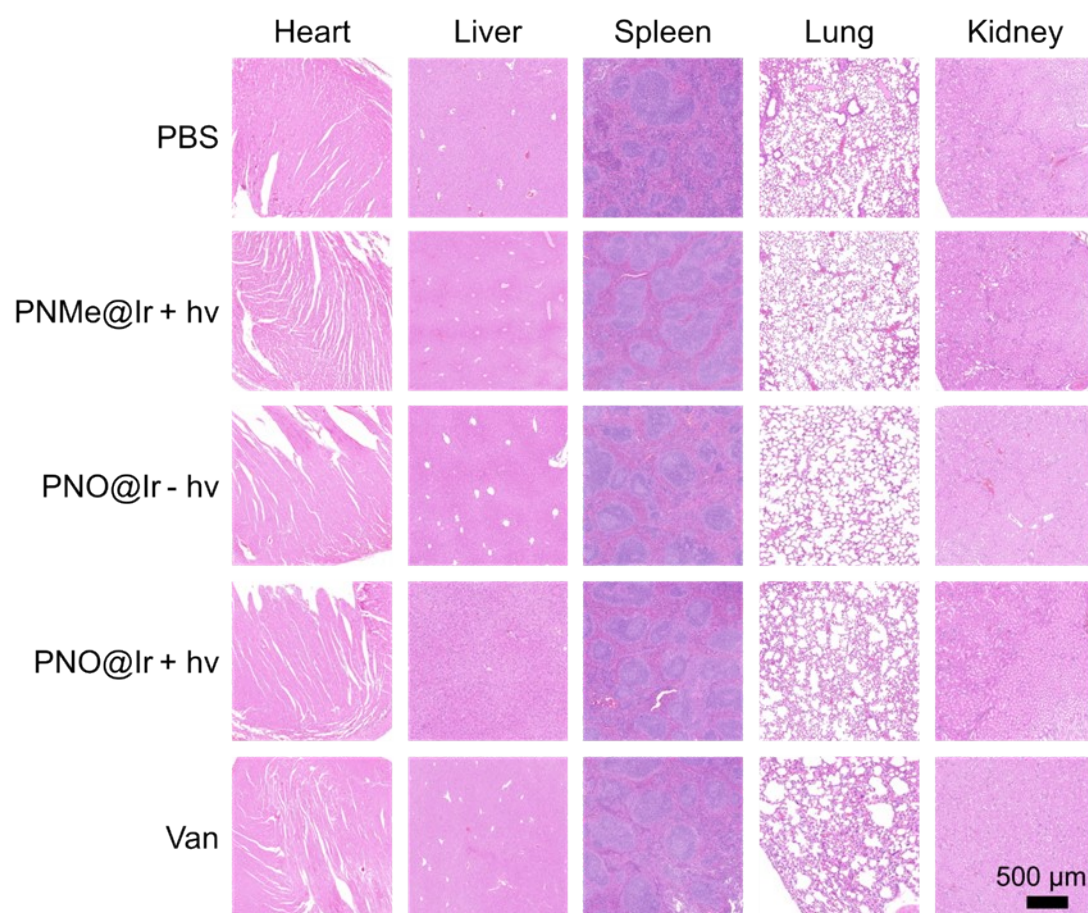

**Fig. S19** Hematoxylin and eosin (H&E) staining of major organs (heart, liver, spleen, lung, and kidney) on day 6 of mice infected with MRSA receiving varying treatments. Scale bar: 500  $\mu\text{m}$ .

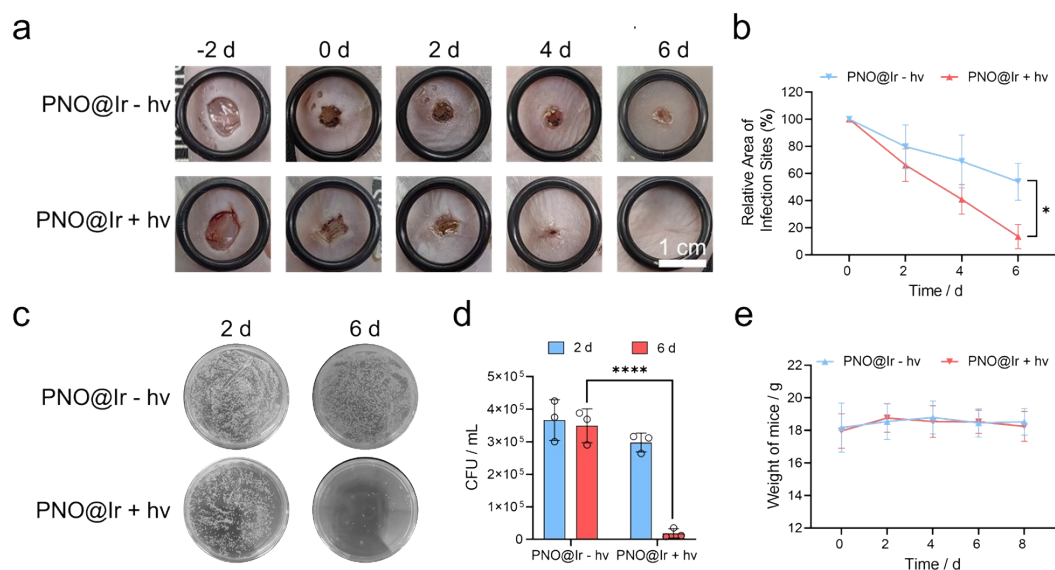

**Fig. S20** (a) Representative images of the wound during the treatment process and (b) quantitative analysis of the infected areas receiving different treatments. Data are shown as the mean  $\pm$  s.d. ( $n = 3$ );  $*p < 0.05$  compared with the PNO@Ir (+ hv) group. (c) Photographs of bacterial colonies on the agar plates of the wound tissues with varying treatments on day 2 and day 6. (d) Bacterial colony-forming unit separated from wound tissues with varying treatments. Data are shown as the mean  $\pm$  s.d. ( $n = 3$ );  $****p < 0.0001$ , compared with the group receiving PNO@Ir (+ hv) treatment on day 6. (e) Changes of body weights of MRSA biofilm-infected mice after different treatments. In all cases, the micelle concentrations were 0.3 g/L, respectively.

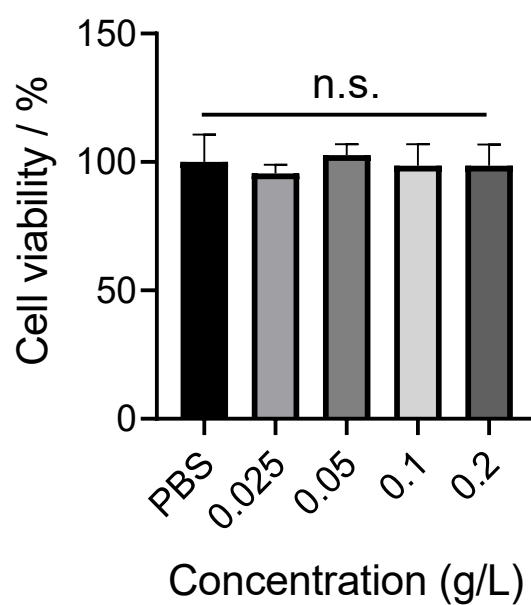

**Fig. S21** Cell viability of human umbilical vein endothelial cells (HUVECs) as determined by MTT assay after 24 h incubation with PNO@Ir. n.s. not significant versus the PBS group.
